## RESEARCH ARTICLE

# Extracellular ATP release predominantly mediates $\text{Ca}^{2+}$ communication locally in highly organised, stellate-Like patterned networks of adult human astrocytes

Si Li<sup>1,2</sup>, E. Scott Graham<sup>3</sup>, Charles P. Unsworth<sup>1,2\*</sup>

**1** Department of Engineering Science, The University of Auckland, Auckland, New Zealand, **2** The MacDiarmid Institute for Advanced Materials and Nanotechnology, Auckland, New Zealand, **3** Department of Molecular Medicine and Pathology & Centre for Brain Research, The University of Auckland, Auckland, New Zealand

\* [c.unsworth@auckland.ac.nz](mailto:c.unsworth@auckland.ac.nz)

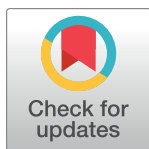

## OPEN ACCESS

**Citation:** Li S, Graham ES, Unsworth CP (2023) Extracellular ATP release predominantly mediates  $\text{Ca}^{2+}$  communication locally in highly organised, stellate-Like patterned networks of adult human astrocytes. PLoS ONE 18(10): e0289350. <https://doi.org/10.1371/journal.pone.0289350>

**Editor:** Mária A. Deli, Eötvös Loránd Research Network Biological Research Centre, HUNGARY

**Received:** March 21, 2023

**Accepted:** July 17, 2023

**Published:** October 3, 2023

**Copyright:** © 2023 Li et al. This is an open access article distributed under the terms of the [Creative Commons Attribution License](https://creativecommons.org/licenses/by/4.0/), which permits unrestricted use, distribution, and reproduction in any medium, provided the original author and source are credited.

**Data Availability Statement:** The image/video dataset used in this study is stored in University of Auckland 'Figshare' data repository with following DOI: <https://doi.org/10.17608/k6.auckland.c.6713391.v1>.

**Funding:** The work was financially supported by the Royal Society of New Zealand James Cook Fellowship (JCF-UOA2001, Understanding How Aggressive Adult Brain Cancer Talks, <https://www.royalsociety.org.nz/what-we-do/funds-and-opportunities/james-cook-research-fellowship/>) the

## Abstract

The 'Astrocyte Network' and the understanding of its communication has been posed as a new grand challenge to be investigated by contemporary science. However, communication studies in astrocyte networks have investigated traditional petri-dish *in vitro* culture models where cells are closely packed and can deviate from the stellate form observed in the brain. Using novel cell patterning approaches, highly organised, regular grid networks of astrocytes on chip, to single-cell fidelity are constructed, permitting a stellate-like *in vitro* network model to be realised. By stimulating the central cell with a single UV nanosecond laser pulse, the initiation/propagation pathways of stellate-like networks are re-explored. The authors investigate the mechanisms of intercellular  $\text{Ca}^{2+}$  communication and discover that stellate-like networks of adult human astrocytes *in vitro* actually exploit extracellular ATP release as their dominant propagation pathway to cells in the network locally; being observed even down to the nearest neighbour and next nearest neighbouring cells—contrary to the reported gap junction. This discovery has significant ramifications to many neurological conditions such as epilepsy, stroke and aggressive astrocytomas where gap junctions can be targeted. In cases where such gap junction targeting has failed, this new finding suggests that these conditions should be re-visited and the ATP transmission pathway targeted instead.

## Introduction

Over the past 10 years, scientific research has revealed that the astrocyte [1] possesses much more diversity in its functionality that was commonly thought beyond its subservient role to the neuron [2–4]. Such functionality has traversed endocannabinoid synthesis [5], immunological signalling [6–8], the production of cytokines and chemokines [9] and the unanticipated modulation of the synaptic cleft between neurons [10–12]. As a consequence of this newly

AUEA Braithwaite-Thompson Graduate Research Award Scheme (<https://www.auckland.ac.nz/en/study/scholarships-and-awards/find-a-scholarship/auca-braithwaite-thompson-graduate-research-award-519-eng.html#:~:text=An%20Award%20of%20up%20to,in%20the%20Faculty%20of%20Engineering.>)”.

**Competing interests:** There are no competing interests.

discovered functionality, contemporary literature has proposed that there should be a drive to understand the ‘Astrocyte Network’ on an equal footing to that as the traditional ‘Neural Network’. This drive is in order to better understand the pathways that calcium (Ca<sup>2+</sup>) communication engages at the network level [13]. Such exploratory research could provide new knowledge and understanding of how astrocytes communicate in networks, revealing clues that would enable the development of novel strategies to treat a whole host of astrocyte related neurological disorders, such as in epilepsy [14, 15], stroke [16], focal cerebral ischemia and aggressive astrocytoma brain cancers such as glioblastoma multiforme [17] and diffuse intrinsic pontine gliomas [18]. Our group’s work is involved with adult human astrocytes and in this article, we will use the well understood human teratocarcinoma NTERA2/D1 cell line (also referred to as hNT/NT2) [19], which has been used for cell transplantation in stroke therapy [20], expresses universal neuronal/astrocytic markers [19], validated to be an authentic alternative to human primary neuronal cells [21] and provides a simple and convenient model of human neural tissue [22, 23], with no ethical concerns being derived from an immortalised stem cell line [19]. Our group has performed extensive work in the field of cell patterning, employing hNT astrocytes on parylene-C/SiO<sub>2</sub> chips with the most relevant to this study, being the development of a highly organised single cell 10×10 grid network of hNT astrocytes to enable study of their communication accurately and repeatedly, being the largest single cell astrocyte networks of its kind [24]. In addition, we have demonstrated that Ca<sup>2+</sup> responses can be evoked from hNT astrocytes when stimulated with nanosecond UV lasers by Raos *et al* [25]. In this article, we combine our work of laser stimulation of human astrocytes [25] with our cell patterned [26] organised grid networks of astrocytes to understand the mechanisms of communication that are evoked in networks of astrocytes. Specifically, we build highly organised 5 × 5 grid networks of hNT astrocytes on parylene-C/SiO<sub>2</sub> chips and stimulate the central cell in the network with a nanosecond UV laser pulse. By applying pharmacological agents to block the common initiation and propagation pathways in astrocytes, we then proceed to determine the exact initiation and propagation pathways that are repeatedly engaged in astrocyte network Ca<sup>2+</sup> communication in the inner and outer regions of the network.

Current research has only reported the initiation and propagation pathways for clusters or sub-clusters of unorganized monolayers of astrocytes of various species under electrical, mechanical and laser stimulation in networks as follows.

**The initiation pathway:** The mechanism for intracellular Ca<sup>2+</sup> initiation was demonstrated to be induced either by extracellular Ca<sup>2+</sup> or intracellular Ca<sup>2+</sup> stores [25–29]. Venance *et al.* demonstrated that Ca<sup>2+</sup> waves of primary rat astrocytes induced either by mechanical stimulation was dependent on the presence of external Ca<sup>2+</sup> [29]. Zhao *et al.* targeted femtosecond laser pulses to the cell membranes of purified rat astrocytes and *hypothesised* that the pore allowed for a small influx of extracellular Ca<sup>2+</sup> from the extracellular fluid resulting in a localized increase in intracellular Ca<sup>2+</sup> [27]. However, Hill *et al.* observed that ATP elicited Ca<sup>2+</sup> elevations in NT2 derived astrocytes were inhibited by the intracellular store depletory thapsigargin, suggesting that intracellular stores were the main Ca<sup>2+</sup> stores for signalling in astrocytes [30]. Furthermore, our group, Raos *et al.* developed a nanosecond laser stimulation technique for elevating Ca<sup>2+</sup> increases in NT2 derived astrocytes and observed that stimulation was still possible in absence of extracellular Ca<sup>2+</sup> and thus, hypothesized that localized ablation of the ER was the primary factor in stimulating Ca<sup>2+</sup> response by nanosecond lasers [25]. Most recently, Fujii *et al.* observed that both omitting extracellular Ca<sup>2+</sup> and inhibiting Ca<sup>2+</sup> stores did not affect Ca<sup>2+</sup> increases in primary rat astrocytes by mechanical stimulation [31]. Fujii *et al.* demonstrated that mechanical stimulation may induce Ca<sup>2+</sup> release from thapsigargin-insensitive Ca<sup>2+</sup> stores.

The propagation pathways: Since astrocytes main physical connection is via intercellular gap junctions [31, 32], the mechanism for intracellular Ca<sup>2+</sup> propagation via transmission of Ca<sup>2+</sup> and inositol 1,4,5-trisphosphate (IP3) ions through gap junctions has become intensively studied [33–35]. Other studies involving primary rat astrocytes have demonstrated that Ca<sup>2+</sup> waves can propagate between physically separated cells, indicating that purinergic signalling may also be involved in Ca<sup>2+</sup> propagation, presumably by secreted extracellular adenosine triphosphate (ATP) [36–38]. ATP can bind to the membrane-bound receptors, resulting in the generation of IP3 which triggers the release of intracellular Ca<sup>2+</sup> from Ca<sup>2+</sup> stores. Guthrie *et al.* demonstrated that purinergic antagonists blocked propagation of electrically evoked Ca<sup>2+</sup> waves, indicating that extracellular ATP was required for normal Ca<sup>2+</sup> wave propagation in primary rat astrocytes [38]. Takano *et al.* demonstrated that Ca<sup>2+</sup> waves of cortical murine astrocytes by mechanical stimulation could propagate to neighbouring astrocytes not only within the same confluent domain but also to neighbouring non-connected astrocyte areas [39]. Zhao *et al.* investigated how to use femtosecond lasers to elevate Ca<sup>2+</sup> increases in rat astrocytes and demonstrated that femtosecond laser-induced Ca<sup>2+</sup> waves were predominantly mediated by the extracellular messenger ATP in partial collaboration with gap junctions [27]. Most recently, Fujii *et al.* demonstrated that persistent Ca<sup>2+</sup> increases propagated rapidly via gap junctions in the proximal region and transient Ca<sup>2+</sup> increases propagated slowly via extracellular diffusion of ATP in the distal region in primary rat astrocytes [31]. In addition, Hill *et al.* investigated the functional properties of NT2 derived neurons and astrocytes and demonstrated that mechanically-induced Ca<sup>2+</sup> waves of NT2 derived astrocytes were gap junction and purinergic signalling dependent [30]. This was supported by inhibition of Ca<sup>2+</sup> responses in the presence of both gap junction blocker and purinergic receptor antagonist.

Previous studies in astrocytes have been limited to clusters or sub-clusters of unorganized astrocyte monolayers [29, 30, 36, 38–40]. To reproduce the morphology and connections of astrocytes *in vitro* and to simplify the complexity of communication *in vitro* cultures, it is important to control where the cells contact with one another. The ability to culture astrocytes in a controlled network configuration with prescribed cell separation distances and connectivity would give insight into the response of astrocyte networks, in a scale that is more physiologically relevant than previously possible. Previous *in vitro* semi-organized network platforms demonstrated by Jordan *et al.* patterned the astrocytes in a trench grid network [41]. Most recently, our group established an experimental platform that can accurately organise astrocytes within a single cell 10×10 grid array network on parylene-C/SiO<sub>2</sub> substrates [23, 41]. The majority of the astrocyte bodies resided on the nodes and the astrocytes were connected to neighbouring cells through the narrow lines between the nodes. In this work, we combine our work on organized astrocyte networks with our work on nanosecond UV lasers stimulation, which successfully elevates Ca<sup>2+</sup> releases in hNT astrocytes, to investigate the underlying initiation and propagation mechanisms of intracellular Ca<sup>2+</sup> waves in organized regular grid astrocytic networks. Specifically, we focus on (1) intracellular Ca<sup>2+</sup> storage, (2) influx of extracellular Ca<sup>2+</sup>, (3) gap junction communication, and (4) ATP pathway contributions in astrocytic networks.

## Materials and methods

### Astrocyte grid networks design & fabrication

Here we use the method of, Li *et al.*, where hNT astrocytes were patterned on the biomaterial, parylene-C, to high resolution at the single-cell level on nodes in a regular grid array (Fig 1) [24, 42]. We used parameters of  $d_N = 65 \mu\text{m}$  node size,  $d_W = 5 \mu\text{m}$  interconnecting line width,

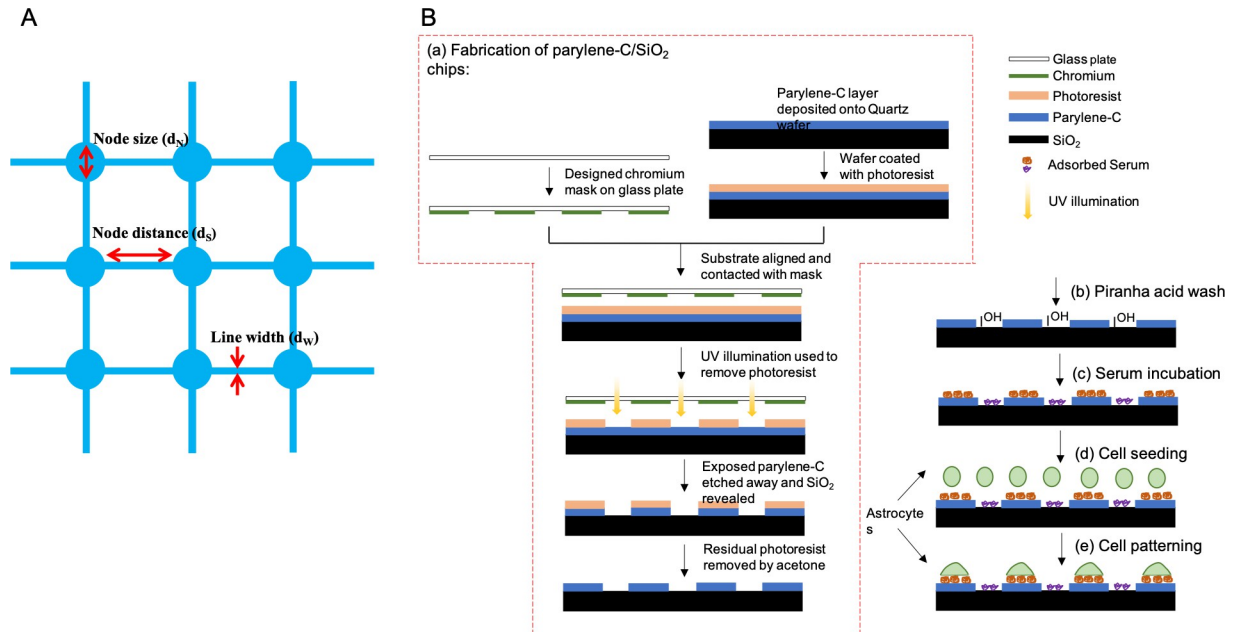

**Fig 1.** (A) Design of astrocyte grid networks. Circular parylene-C nodes connected by narrow lines. The three optimal parameters were: 65 $\mu$ m node size ( $d_N$ ), 90 $\mu$ m node distance ( $d_S$ ) and 5 $\mu$ m line width ( $d_W$ ) are indicated [11]. (B) Flow diagram of (a) the photolithography process for fabrication of parylene-C/SiO<sub>2</sub> chips, (b) chip cleaning, (c) serum incubation, (d) cell seeding, and (e) cell patterning. Piranha acid wash cleaned off organic residues and debris during the fabrication. Serum incubation coated chips, promoted cell adhesion on parylene and inhibited cell adhesion on SiO<sub>2</sub>. After the cell seeding, the astrocytes on the parylene area attached to the surface and were repelled from the SiO<sub>2</sub> substrates.

<https://doi.org/10.1371/journal.pone.0289350.g001>

and  $d_S = 90 \mu\text{m}$  node distance which Li *et al.* demonstrated achieved optimally defined single-cell grid networks.

Photolithography was used to construct the parylene-C grid networks on parylene-C/SiO<sub>2</sub> substrates for hNT astrocytes as in [24, 42]. A parylene-C layer was deposited onto a quartz wafer via chemical vapour deposition (CVD). Positive photoresist was then spin-coated on the wafer using a suitable photo-resist coating system. Substrates were aligned with pre-manufactured chromium photomask with the network design and then exposed with a UV illumination to remove exposed photoresist. Any unprotected parylene area was then etched off by an oxygen plasma etch system to reveal the underlying SiO<sub>2</sub>. Wafers were then diced into chips, rinsed in deionized H<sub>2</sub>O and blown dry with nitrogen. The residual photoresist layer was removed by rinsing with acetone. The manufactured parylene-C/SiO<sub>2</sub> chips were then cleaned with piranha acid in a 5:3 ratio of 30% hydrogen peroxide (H<sub>2</sub>O<sub>2</sub>) and 98% sulphuric acid (H<sub>2</sub>SO<sub>4</sub>) for 10–15 min and rinsed in Milli-Q water. After the piranha acid wash, chips were immediately placed in a 24-well plate and sterilized in 2% Penicillin-Streptomycin-Glutamine (PSG) solution for 30–60 min at room temperature. Finally, the chips were incubated in fetal bovine serum (FBS) for 3 h at 37°C and 5% CO<sub>2</sub> to activate the patterns.

### hNT astrocyte cell-culture

hNT astrocytes were differentiated from the NTera2/D1 (NT2/hNT) cell line over 9 weeks according to the protocols [19, 22, 29] hNT precursor cells were cultured in 10% FBS DMEM: F12 media containing 10  $\mu$ M retinoic acid (RA) in petri dish, replating every 2–3 days for the first 2 weeks. Then, cells were transferred into T-75 flasks with media changes every 2–3 days treated with 10  $\mu$ M RA for 7–10 days. At week four, cells with neuronal morphology were harvested by selective trypsinization and removed from the culture. The remaining underlying

astrocyte precursor cells were replated in the T-75 flask and cultured in 5% FBS/DMEM: F12 with decreasing concentrations of the mitotic inhibitors (uridine (Urd), 5-fluoro-2'-deoxyuridine (FUdR) and  $\beta$ -D-arabinofuranoside (AraC)) for further 5 weeks, with media changes every 2–3 days. The NT2 astrocytes were finally harvested with 0.05% Trypsin and seeded on parylene-C/SiO<sub>2</sub> chips.

hNT astrocytes were dissociated from the flask with trypsinization, rinsed with 5% FBS/DMEM: F12 and centrifuged at 200 g for 5 min. Then, astrocytes were re-suspended in 1 mL of the medium, counted and seeded on parylene-C/SiO<sub>2</sub> chips at a density of 50 cells/mm<sup>2</sup> [40]. The chips were incubated at 37°C and 5% CO<sub>2</sub> for 2 days to allow the astrocytes to migrate onto the patterns (Fig 1).

### Laser stimulation

Nanosecond laser pulses were generated by a MicroPoint Laser Illumination and Ablation System (Andor Technology) connected to an Olympus BX53 upright microscope and controlled by Andor iQ software. The microscope was set up to operate in reflection mode with 10× water immersion objective. The laser system consisted of a pulsed nitrogen laser producing single 200  $\mu$ J, 3 ns duration pulses as determined optimal to induce Ca<sup>2+</sup> elevations in hNT astrocytes [25]. The wavelength of the laser was tuned from its standard wavelength of 340 nm to the optimum 365 nm wavelength required to induce Ca<sup>2+</sup> elevations in hNT astrocytes [25] by a dye cell containing 6 mM 2-(4-Biphenyl)-5-(4-t-butylphenyl)-1,3,4-oxadiazol (BPBD) in methanol. The optical path contained a mirror galvanometer which facilitated fast and precise steering of the laser beam to user-specified locations and a motorized attenuator that allowed for selective attenuation of the beam energy. Laser pulses were manually triggered.

### Cell labelling & chemical blockers

hNT astrocytes were stained with a live 1  $\mu$ M Cell Tracker Green Dye (CMFDA) and Hoechst 33342 (Blue) at two drops per mL in 5% FBS/DMEM: F12 for 30 min at 37°C and 5% CO<sub>2</sub>. For intracellular Ca<sup>2+</sup> measurements, cells were stained with a live 1  $\mu$ M Fluo-4 AM dye and Hoechst 33342 (Blue) for 40–60 min at room temperature. Cells were rinsed in FluoroBrite with 1% FBS twice to improve signal-to-noise ratio of fluorophores and preserve cell health.

Various pharmacological blocking agents were administered to the hNT astrocytes before the experiments in order to identify the initiation and propagation pathways mechanisms of hNT astrocytes. The initiation and propagation pathways were blocked as follows:

1. **ER Ca<sup>2+</sup> store:** Thapsigargin (Tg) has been shown to deplete the Ca<sup>2+</sup> store inside the endoplasmic reticulum (ER) of hNT astrocytes manufactured by Hill *et al.* [30]. Thus, according to [18] the astrocytes were incubated in 1  $\mu$ M thapsigargin medium for 30 min before and during the experiments.
2. **Extracellular Ca<sup>2+</sup>:** Ca<sup>2+</sup>-free DMEM and Ca<sup>2+</sup>-free HBSS were demonstrated to deplete extracellular Ca<sup>2+</sup> in hNT astrocytes [25]. Thus, Ca<sup>2+</sup>-free DMEM/HBSS was used to replace the regular medium after the Fluo-4 AM loading. This treatment was used to remove the extracellular Ca<sup>2+</sup> sources immediately before the laser stimulation experiments.
3. **Gap junction:** Carbenoxolone (CBX) has been demonstrated to block the gap junction pathways in hNT astrocytes [30]. Thus, the hNT astrocytes were incubated in 100  $\mu$ M CBX medium and remained in medium during the laser stimulation experiment.
4. **Extracellular messenger ATP:** Suramin has been reported to be a non-selective antagonist of purinergic receptors and used in primary rat astrocytes [26, 30]. We found that by

supplying 100  $\mu\text{M}$  suramin in the medium for 30 min before and during the experiments behaved the same for *in vitro* hNT astrocytes.

### Cell imaging & image processing

Fluo-4 fluorescence images were captured by an Andor Clara-E interline CCD camera that was controlled by the Andor iQ software package. The Fluo-4 fluorescence images were imported into the image processing software ImageJ ©. The region of interest (ROI) of each cell was created manually by the ImageJ's ROI management toolbox and the fluorescence of each ROI during every frame was measured automatically. The fluorescence data was then processed in MATLAB © (R2016b Pro, The MathWorks Inc., Natick, MA) to determine the change in fluorescence over the baseline fluorescence prior to stimulation ( $\Delta F/F_0$ ).

### Statistical analysis

All quantitative data in the text and figures are presented as mean  $\pm$  standard deviation. Statistical analysis of the results was performed using the software GraphPad Prism 7 and 5% and 10% significance levels are presented using a student two-sided t-test.

## Results

### Cell patterning in organised grid network

We demonstrated that hNT astrocytes could be successfully patterned on organised grid networks with optimal network parameters being a 65- $\mu\text{m}$  node size, 5- $\mu\text{m}$  line width, and 90- $\mu\text{m}$  node distance (65/5/90) [12], we showed that 80% of astrocyte bodies were contained as single cells on the nodes of the grid networks and connected via the tracks to astrocytes on other adjacent nodes. In order to determine the effect of inter-node distance on Ca<sup>2+</sup> propagation through the networks, the node size and line width of the networks were set at 65  $\mu\text{m}$  and 5  $\mu\text{m}$ , respectively, and the inter-node distances were varied (60  $\mu\text{m}$ , 75  $\mu\text{m}$  and 90  $\mu\text{m}$ ) where 90  $\mu\text{m}$  was the maximum field of view using the laser ablation system which permitted a (5  $\times$  5) grid network. Fig 2, shows the patterning obtained for hNT astrocytes at 60, 75 and 90  $\mu\text{m}$  node distances networks. As can be seen, networks with 60  $\mu\text{m}$  inter-node distance had disrupted patterning results (Fig 2A), and good patterning obtained for networks with 75- $\mu\text{m}$  node distance, and 90- $\mu\text{m}$  node distance as predicted by [24]. Considering that we would stimulate the central cell in the network, we elected to show that Ca<sup>2+</sup> propagation from the central cell through to adjacent cells (the nearest neighbours NI) and the outer cells (the next nearest neighbours NII). Additionally, inter-node distances greater than 90  $\mu\text{m}$  were associated with network magnifications of less than 5  $\times$  5, which would not be sufficient to examine the Ca<sup>2+</sup> propagation in the networks of at least the nearest neighbours and next nearest neighbours. Thus, networks with a 65- $\mu\text{m}$  node size, 5- $\mu\text{m}$  interconnecting line width, and a node-distances of 75 or 90  $\mu\text{m}$  (Fig 2B and 2C) were used to investigate the effect of different inter-node distances on Ca<sup>2+</sup> propagation through the networks.

### Determining the optimum laser power for calcium signalling in astrocytes networks

The neighbouring hNT astrocytes in the organised networks were classified into two regions according to their distance from the stimulated central cell as follows: cells in the inner neighbourhood (N I)—namely the nearest neighbours directly adjacent to the surrounding the central cell, and cells in the outer neighbourhood (N II)—namely the next nearest neighbours

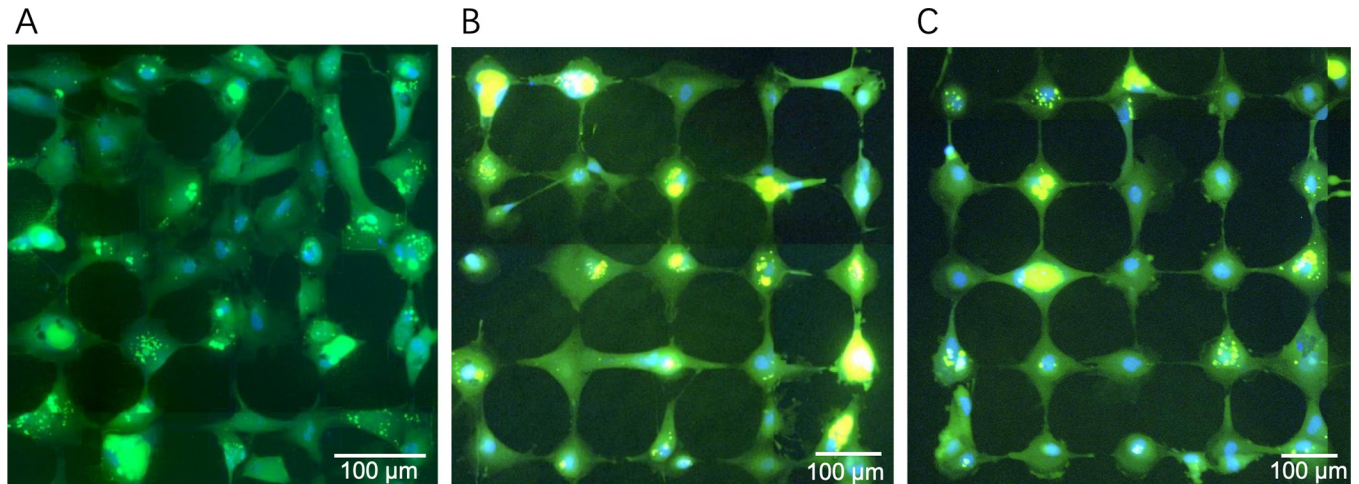

**Fig 2. Patterned astrocyte networks live stained with CMFDA and Hoechst 33342.** The networks had node size of 65  $\mu\text{m}$ , interconnecting line widths of 5  $\mu\text{m}$ , and (A) 60- $\mu\text{m}$  inter-node distance, (B) 75- $\mu\text{m}$  inter-node distance, and (C) 90- $\mu\text{m}$  inter-node distance, respectively. Scale bar = 100  $\mu\text{m}$ .

<https://doi.org/10.1371/journal.pone.0289350.g002>

directly adjacent to the inner neighbourhood, as shown in Fig 3A. Whilst Raos *et al.* [25] determined that 4–12  $\mu\text{J}$ , maintaining a cell viability of 87.5% for single hNT astrocytes on nodes, we determined that a 12  $\mu\text{J}$  laser pulse was optimum to evoke Ca<sup>2+</sup> propagation from the central cell to the outer neighbouring cells in 5 $\times$ 5 network for both 75 and 90  $\mu\text{m}$  inter-node distances [43], shown Fig 3B and 3C. It was found that there was no significant difference in the results between inter-node distances of 75 and 90  $\mu\text{m}$ .

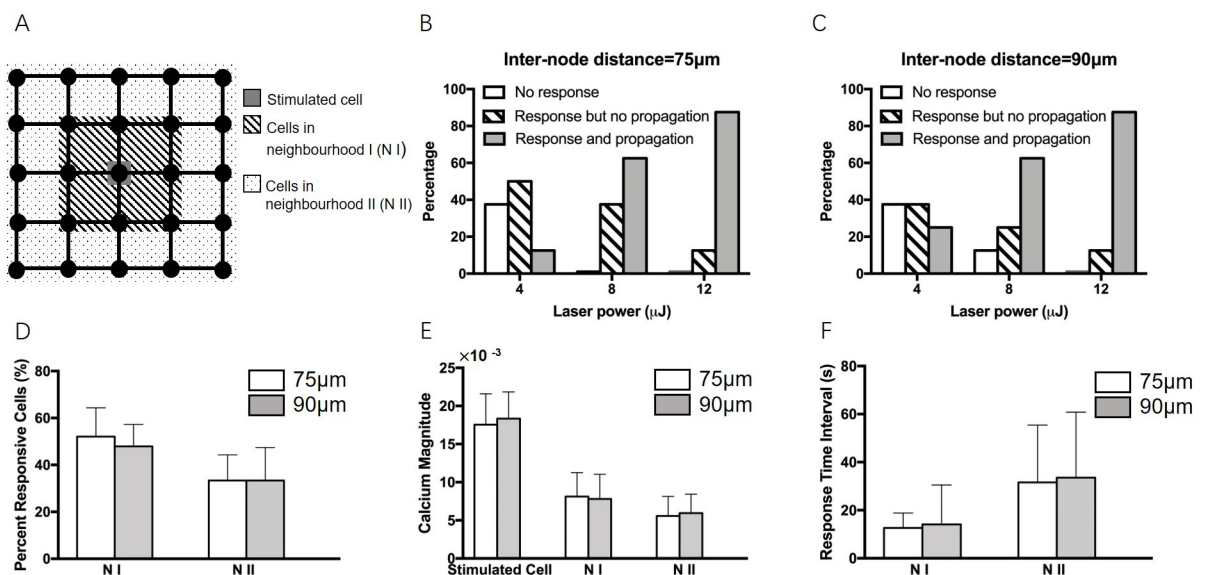

**Fig 3.** (A) Cell classification into three groups according to the distance from the laser-stimulated cell: Stimulated cell (grey), cells in neighbourhood N I (hatching), cells in neighbourhood N II (dotted). Different laser power generated different Ca<sup>2+</sup> response in both (B) 75  $\mu\text{m}$  and (C) 90  $\mu\text{m}$  node distances networks. Experiment repeats equal to 8 (N = 8). 'No response' refers to cells with no observed Ca<sup>2+</sup> increase (white). 'Response but no propagation' refers to cells giving a Ca<sup>2+</sup> response, but Ca<sup>2+</sup> waves did not propagate to neighbouring cells (hatching). 'Response and propagation' indicates cells that produced Ca<sup>2+</sup> responses and Ca<sup>2+</sup> waves propagated to the neighbouring cells in the network (grey). (D) Percentage of responsive cell, (E) Ca<sup>2+</sup> magnitude of both stimulated cell and neighbouring cells, and (F) cell response time interval for both 75  $\mu\text{m}$  and 90  $\mu\text{m}$  node distances networks. Astrocytes were stimulated by a single laser pulse of 12  $\mu\text{J}$  in (D-F). Error bars represent the standard deviation (N = 6).

<https://doi.org/10.1371/journal.pone.0289350.g003>

In addition, we observed that when the astrocyte in the centre of the network was stimulated by a single laser pulse of 12  $\mu\text{J}$ , the intracellular Ca<sup>2+</sup> signals propagated from the stimulated astrocyte to the adjacent cells (namely, the nearest neighbours) in the patterned network and then to the outer cells (namely, the next nearest neighbours) in the patterned network. Fig 3D–3F shows the results of the percentage of responsive cells, Ca<sup>2+</sup> magnitude of both stimulated cell and neighbouring cells, and cell response time interval for both 75  $\mu\text{m}$  and 90  $\mu\text{m}$  node distances networks, respectively. Ca<sup>2+</sup> magnitude refers to the maximum value of the fluorescence change ( $\Delta F/F_0$ ) in Ca<sup>2+</sup> traces.

It was found in Fig 3D that the percentage of responsive cells in neighbourhood II (N II) was lower than the closer cells in neighbourhood I (N I) and there was no significant difference in the responsive percentage in N I and N II between 75  $\mu\text{m}$  and 90  $\mu\text{m}$  node distances. In Fig 3E, we found that the magnitudes of the Ca<sup>2+</sup> responses of nearest neighbours (in the first neighbourhood) was reduced by a factor of 2.13 from the central stimulated cell and the Ca<sup>2+</sup> responses of next nearest neighbours (in the second neighbourhood) was reduced by a factor of 3.41 from the central stimulated cell. It was found that there was no significant difference in the Ca<sup>2+</sup> magnitude between 75  $\mu\text{m}$  and 90  $\mu\text{m}$  node distances networks in either the N I or N II neighbourhoods. Furthermore, we observed that the mean response time interval of cells in N I was  $17.3 \pm 16.25$  s and the mean response time interval of cells in N II was  $36.4 \pm 28.2$  s. No significant difference of response time was observed between 75  $\mu\text{m}$  and 90  $\mu\text{m}$  node distances networks in either N I or N II.

### Ca<sup>2+</sup> responses in grid organised network in different groups

We first stained the Cx43 gap junction protein to visually observe the amount of gap junctions that exist in standard non-patterned *in vitro* culture of hNT astrocytes as compared to organised networks of hNT astrocytes. Fig 4 shows the immunofluorescence staining of the Cx43 gap junction protein for unorganised hNT astrocytes in petri dishes (Fig 4A) and organised hNT astrocytes in grid networks (Fig 4B). In Fig 4A, it was observed that the Cx43 staining at the cell circumference suggests that the gap junctions were formed along the cytoplasmic peripheries of the cells. However, in Fig 4B, the Cx43 staining occurred at the ends of cell processes suggested that gap junctions were formed between cells processes in the patterned astrocyte networks. Secondly, as the astrocyte architecture formed into the networks it was observed that the gap junction localisation is considerably lower than that those observed in non-patterned astrocytes.

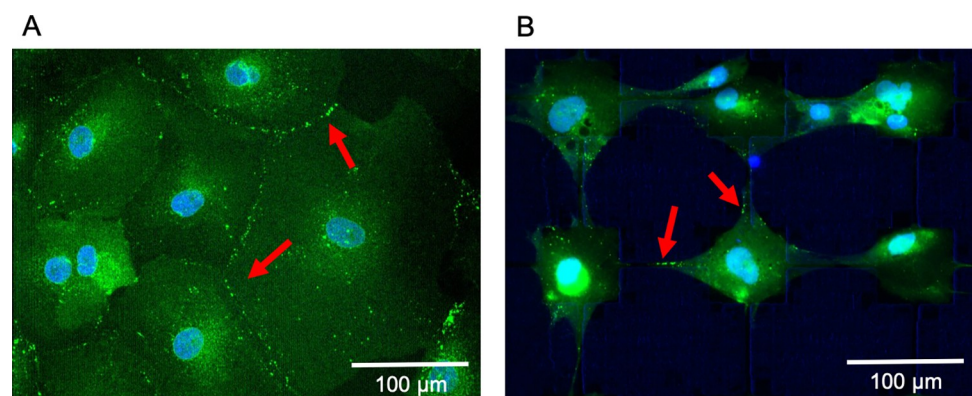

**Fig 4.** Connexin 43 (Cx43) staining of hNT astrocytes in: (A) petri dishes, and (B) organised grid networks. Arrows show areas of the Cx43 staining between adjacent cells, suggesting gap junction formation.

<https://doi.org/10.1371/journal.pone.0289350.g004>



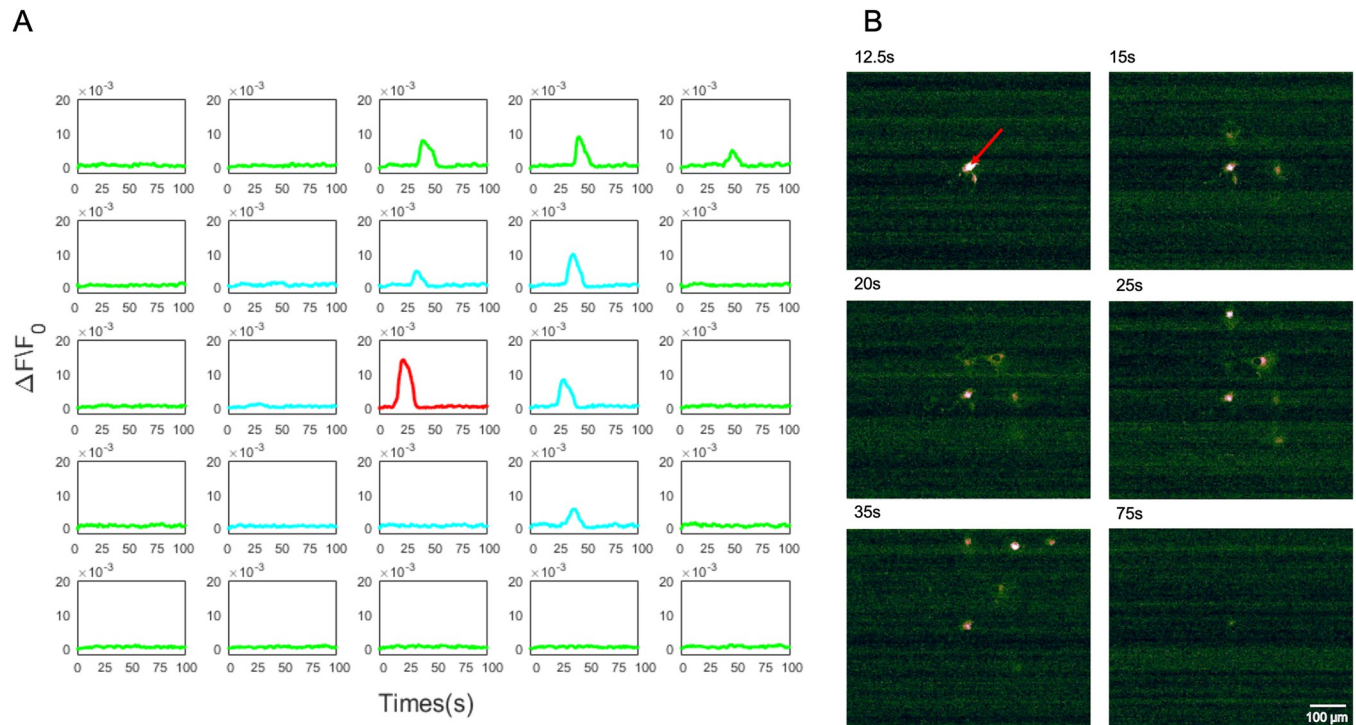

**Fig 5. A spatial arrangement of the single  $\text{Ca}^{2+}$  traces of each hNT astrocyte in the 5x5 grid network in control group, without any pharmacological agents: Stimulated cell (central—red), N I (blue), and N II (green).  $\text{Ca}^{2+}$  responses are represented as the change in fluorescence over the baseline fluorescence prior to stimulation ( $\Delta F/F_0$ ).**

<https://doi.org/10.1371/journal.pone.0289350.g005>

In order to analyse the results of pharmacological blocking agents, cells that were not treated with any pharmacological agents were used first as the control group. The central astrocyte in the network was stimulated using a single 12  $\mu\text{J}$  laser pulse. The  $\text{Ca}^{2+}$  intensity of the laser-stimulated cell increased dramatically in response to the stimulation. Further, intracellular propagation of  $\text{Ca}^{2+}$  to the outer neighbourhoods of the network was also observed [43]. Finally, the  $\text{Ca}^{2+}$  concentration decreased back to the baseline level. It was observed that the propagation of the intercellular  $\text{Ca}^{2+}$  is not equal in every direction, which was different from the mathematical models demonstrated by *Lallouette et al.* [44]. Fig 5 shows the  $\text{Ca}^{2+}$  responses of the stimulated cell, the astrocytes in the neighbourhood N I and N II of the organised grid network in control group. Preliminary observations of simple bulk  $\text{Ca}^{2+}$  flow in a grid network of hNT astrocytes stimulated by a UV laser pulse was reported by *Li et al.* [43] at conference level.

We then proceeded to investigate the  $\text{Ca}^{2+}$  initiation mechanism of the central stimulated cell for the hNT astrocyte. The mechanisms underlying the  $\text{Ca}^{2+}$  initiation was pharmacologically examined by treating cells with 1  $\mu\text{M}$  Tg or  $\text{Ca}^{2+}$ -free DMEM/HBSS. Tg inhibits  $\text{Ca}^{2+}$  storage in the ER, while the use of  $\text{Ca}^{2+}$ -free DMEM/HBSS was used to inhibit  $\text{Ca}^{2+}$  influx from the medium.

1. **Intercellular  $\text{Ca}^{2+}$  of the ER blocked using Tg.** In Fig 6A and 6B, we observed that Tg successfully blocked the intracellular  $\text{Ca}^{2+}$  in the stimulated cell as no fluorescence was observed in the central laser stimulated cell. Therefore, no  $\text{Ca}^{2+}$  responses were observed in the NI and N II neighbourhoods.
2. **Extracellular  $\text{Ca}^{2+}$  from media blocked using  $\text{Ca}^{2+}$ -free DMEM/HBSS.** In Fig 6C and 6D, shows the  $\text{Ca}^{2+}$  responses with the presence of  $\text{Ca}^{2+}$  free media. We observed that the

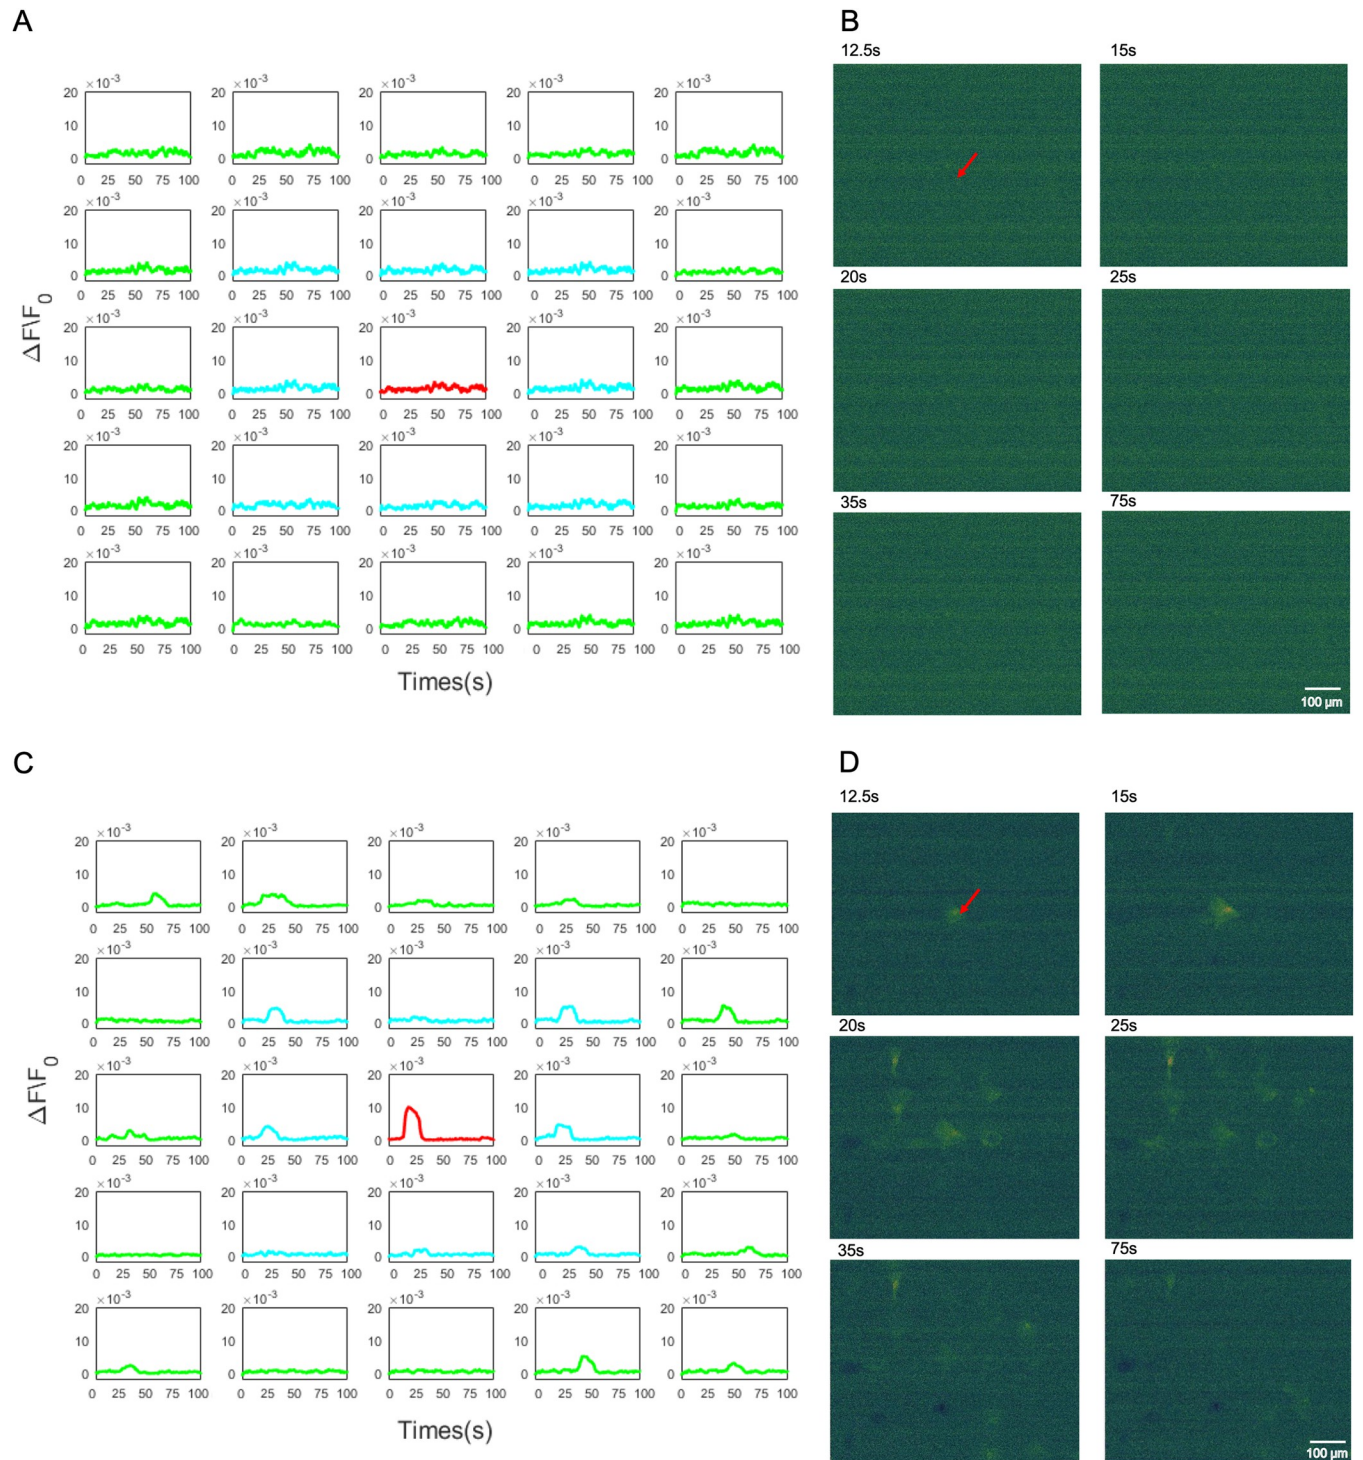

**Fig 6.** (A) A spatial arrangement of the single  $\text{Ca}^{2+}$  traces of each hNT astrocyte in the  $5 \times 5$  grid network treated with Tg, which depleted ER calcium store: stimulated cell (central—red), N I (blue), and N II (green). (B) Pseudo-colour Fluo-4 fluorescence images showing the propagation of an intercellular  $\text{Ca}^{2+}$  waves subsequent to the nanosecond laser stimulation of Tg group. (C) A spatial arrangement of the single  $\text{Ca}^{2+}$  trace of each hNT astrocyte using  $\text{Ca}^{2+}$ -free DMEM/HBSS which initially removes extracellular  $\text{Ca}^{2+}$  from the medium: stimulated cell (red), N I (blue), and N II (green). (D) Pseudo-colour Fluo-4 fluorescence images showing the propagation of an intercellular  $\text{Ca}^{2+}$  waves subsequent to the nanosecond laser stimulation of  $\text{Ca}^{2+}$ -free group.  $\text{Ca}^{2+}$  responses are represented as the change in fluorescence over the baseline fluorescence prior to stimulation ( $\Delta F/F_0$ ).

<https://doi.org/10.1371/journal.pone.0289350.g006>

stimulation was still possible in the absence of extracellular Ca<sup>2+</sup>, which were consistent with the results reported by Raos *et al.* [25]. A Ca<sup>2+</sup> responsive peak in the stimulated cell was observed immediately after the laser stimulation. Further, the Ca<sup>2+</sup> peak magnitude of astrocytes in neighbourhoods NI and NII to be much lower than that observed in the stimulated cell.

Next, we investigated the mechanism by which Ca<sup>2+</sup> propagation occurs from the central stimulated cell to neighbouring cells. The mechanisms underlying the Ca<sup>2+</sup> propagation during Ca<sup>2+</sup> waves were pharmacologically examined by treating cells with 100 μM CBX and 100 μM suramin, to block the gap junction communication and the extracellular ATP pathway, respectively.

1. **Gap junction communication blocked using CBX.** In Fig 7A and 7B, we observed that the Ca<sup>2+</sup> propagation still occurred in the absence of the gap junction pathway.
2. **Extracellular ATP pathway blocked using suramin.** Fig 7C and 7D shows the Ca<sup>2+</sup> responses of the stimulated cell and cells in neighbourhoods N I and N II when the extracellular ATP pathway was blocked by suramin. We observed the Ca<sup>2+</sup> responses of astrocytes in neighbourhoods N I and N II to be severely inhibited due to the absence of the ATP pathway, with only one cell provided a heavily attenuated fluorescence in neighbourhood N I. No fluorescence was observed in N II.

### Analysis of Ca<sup>2+</sup> initiation and propagation mechanism in organised networks

To investigate the mechanism of Ca<sup>2+</sup> initiation, the percentages of responsive stimulated central cells in the different pharmacological groups (N = 10 experiments) were first calculated, as shown in Fig 8A. Fig 8A shows that for 9 out of the 10 experiments (90%) of the control group, the stimulated single central cell responded to laser stimulation. It was determined that, only in 1 out of the 10 experiments (10%) of Tg group, the stimulated central cell successfully responded to the laser stimulation. Therefore, the Ca<sup>2+</sup> responses induced by the laser activation of the central astrocyte were abolished in the group treated with Tg ( $p < 0.0001$ ). It was found that in 8 out of 10 experiments (80%) of Ca<sup>2+</sup>-free group, the stimulated central cells responded to the stimulation. It was found that the Ca<sup>2+</sup>-free group did not have a significant difference compared to the control group ( $p = 0.556$ ). We found that there was a 100% stimulation response in astrocytes treated with CBX, which implied that initiation did not require gap junctions. Further, there was a 90% stimulation response with the treatment of suramin. From this, it was determined that the CBX ( $p = 0.3306$ ) and suramin ( $p = 0.99$ ) groups were not significantly different to the control group.

The peak Ca<sup>2+</sup> magnitudes of stimulated central cells in each pharmacological group were then calculated. Fig 8B shows the Ca<sup>2+</sup> magnitudes of stimulated central cells in different pharmacological groups. The peak Ca<sup>2+</sup> magnitude of stimulated central cells in the control group was ( $\Delta F/F_0 = 18 \pm 1.836 \times 10^{-3}$ ). The peak Ca<sup>2+</sup> magnitude of the stimulated central cell in Tg group ( $0.3833 \times 10^{-3}$ ) was significantly lower than the control group ( $p = 0.0002$ ). It was observed that the Ca<sup>2+</sup> magnitude of stimulated central cells in groups with the treatment of Ca<sup>2+</sup>-free DMEM/HBSS was  $14.13 \pm 0.9514 \times 10^{-3}$  ( $p = 0.091$ ). In addition, the Ca<sup>2+</sup> magnitude of the stimulated central cells in the groups that were treated with CBX and suramin were  $16.88 \pm 1.574 \times 10^{-3}$  and  $15.72 \pm 2.067 \times 10^{-3}$ , respectively. These results were also not significantly different to the control group (CBX:  $p = 0.6542$ ; Suramin:  $p = 0.4282$ ).

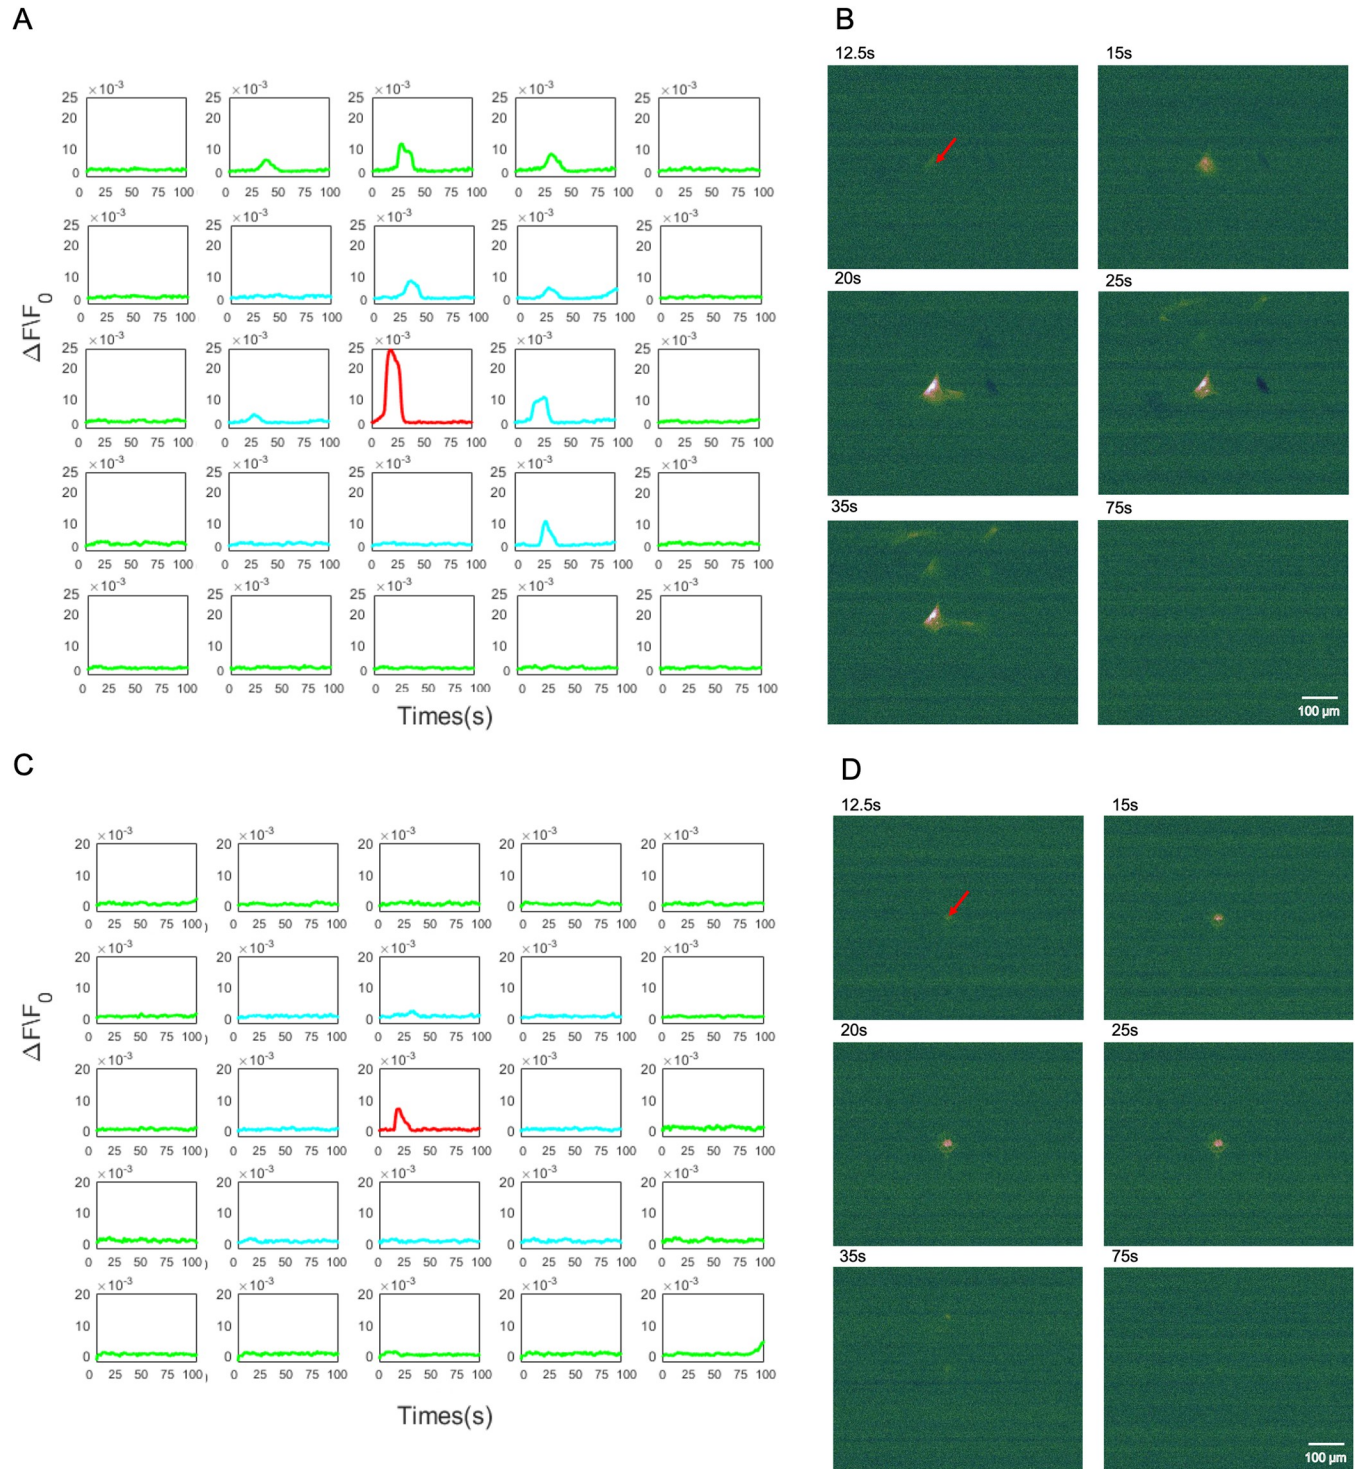

**Fig 7.** (A) A spatial arrangement of the single  $\text{Ca}^{2+}$  traces of each hNT astrocyte in the  $5 \times 5$  grid network treated with CBX, which blocked gap junction communication: stimulated cell (central—red), N I (blue), and N II (green). (B) Pseudo-colour Fluo-4 fluorescence images showing the propagation of an intercellular  $\text{Ca}^{2+}$  waves subsequent to the nanosecond laser stimulation of Tg group. (C) A spatial arrangement of the single  $\text{Ca}^{2+}$  trace of each hNT astrocyte using suramin to block the extracellular ATP pathway: stimulated cell (red), N I (blue), and N II (green). (D) Pseudo-colour Fluo-4 fluorescence images showing the propagation of an intercellular  $\text{Ca}^{2+}$  waves subsequent to the nanosecond laser stimulation of  $\text{Ca}^{2+}$ -free group.  $\text{Ca}^{2+}$  responses are represented as the change in fluorescence over the baseline fluorescence prior to stimulation ( $\Delta F/F_0$ ).

<https://doi.org/10.1371/journal.pone.0289350.g007>

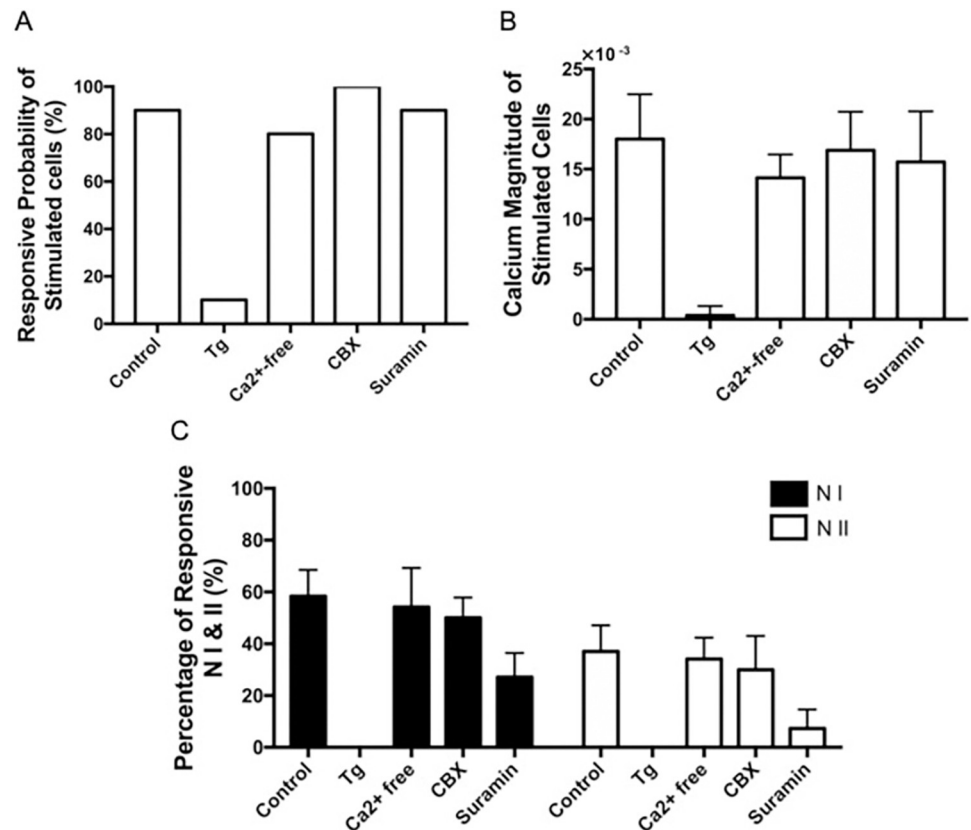

**Fig 8. Pharmacological characterization of Ca<sup>2+</sup> initiation and propagation.** (A) Responsive probability of stimulated cells in control and different pharmacological agent groups. (N = 10) (B) Peak Ca<sup>2+</sup> magnitude of stimulated cells in control and different treatment groups. (N = 6). (C) Percentage of total responsive neighbouring cells. (N = 6) (D) The percentage of responsive N I (cells in neighbourhood I from the stimulated cell) and N II (cells in neighbourhood II from the stimulated cell) in different groups. (N = 6). Astrocytes were stimulated by a single laser pulse of 12  $\mu$ J. Astrocytes were treated with 1  $\mu$ M Tg, Ca<sup>2+</sup>-free DMEM/HBSS, 100  $\mu$ M CBX, and 100  $\mu$ M suramin. Error bars represent the standard deviation.

<https://doi.org/10.1371/journal.pone.0289350.g008>

To investigate the mechanism of Ca<sup>2+</sup> propagation, the percentages of responsive cells of N I and N II were separated and compared in different pharmacological groups as shown in Fig 8C. In the control group, a total of 58.83 $\pm$ 10.2% of N I and 37 $\pm$ 10.1% of N II cells showed Ca<sup>2+</sup> responses. As we described above, there were no responsive cells in the N I and N II in the Tg group, given that there was no Ca<sup>2+</sup> response in the stimulated cell. The percentages of responsiveness in the N I and N II in the Ca<sup>2+</sup>-free group were 54.17 $\pm$ 15.1% ( $p = 0.5884$ ) and 34.13 $\pm$ 8.3% ( $p = 0.6017$ ). However, these values were not significantly different to the control. It was observed that 50 $\pm$ 7.9% of N I ( $p = 0.1449$ ) and 30 $\pm$ 13.1% of N II ( $p = 0.0326$ ) were responsive in CBX group, respectively. It was found that only 27 $\pm$ 9.4% cells in N I ( $p = 0.0003$ ) and 7.3 $\pm$ 7.3% cells in N II ( $p = 0.0002$ ) responded in suramin group. This response was significantly lower than that recorded in the control group. In addition, we also observed that the percentage of responsive N II cells was significantly lower than that of N I cells.

In conclusion, these results indicated that the Ca<sup>2+</sup> released from the Ca<sup>2+</sup> store of the ER, blocked by Tg, is responsible for Ca<sup>2+</sup> initiation in hNT astrocytes under the nanosecond laser stimulation, instead of the influx of extracellular Ca<sup>2+</sup>, and the ATP pathway, blocked by suramin, is responsible for Ca<sup>2+</sup> propagation instead of the gap junctions in organised astrocyte networks.

## Discussion

Increases in Ca<sup>2+</sup> concentration that spread from cell to cell provide a mechanism for astrocytes to coordinate many cellular activities. In this study, we investigated the Ca<sup>2+</sup> initiation mechanisms and Ca<sup>2+</sup> propagation mechanism from stimulated cell to neighbouring cells by UV nanosecond laser stimulation, in organised hNT astrocyte grid networks for the first time.

### Calcium initiation

In order to determine which pathway was responsible for Ca<sup>2+</sup> initiation in hNT astrocytes, we examined the effect of removing the Ca<sup>2+</sup> in the extracellular media (by using a Ca<sup>2+</sup>-free media) in order to halt Ca<sup>2+</sup> influx intercellularly, which Raos *et al.* [25] used for hNT astrocytes *in vitro* cultures under UV nanosecond laser stimulation. And we employed Thapsigargin (Tg) to deplete the intercellular ER Ca<sup>2+</sup> store, which Hill *et al.* [30] used on hNT astrocytes *in vitro* cultures under ATP stimulation. These results demonstrated that Ca<sup>2+</sup> increases in hNT astrocytes stimulated by a UV nanosecond laser pulse were mainly dependent on intracellular ER Ca<sup>2+</sup> storage instead of the extracellular Ca<sup>2+</sup>. This result was found to be similar to Hill *et al.*'s work [30] on hNT astrocytes in unorganised standard *in vitro* cultures albeit under ATP stimulation.

The closest laser stimulation regime to evoke Ca<sup>2+</sup> responses was by Zhao *et al.* [45] who targeted IR femtosecond laser pulses to the cell membranes of rat primary astrocytes and observed the transient appearance of a pore in the cell membrane. Zhao *et al.* hypothesised that the pore allowed for the influx of extracellular Ca<sup>2+</sup> into the cytoplasm resulting in a localised increase in intracellular Ca<sup>2+</sup>, which is then propagated throughout the stimulated cell by calcium induced calcium release (CICR). However, absorption dynamics are different between femtosecond and nanosecond laser ablation. Nanosecond laser pulses are less confined in the z-axis directions. This implies that a single nanosecond laser pulse could cause both the stimulation of the cell membrane and stimulation of the ER. Most recently, Raos *et al.* [25] demonstrated that single hNT astrocytes localised on nodes of parylene-C could be stimulated with UV laser nanosecond stimulation without extracellular Ca<sup>2+</sup> and hypothesised that localised stimulation of the ER could be a primary factor in producing a Ca<sup>2+</sup> response. Therefore, in this study, we provided further evidence to support the hypothesis of Raos *et al.* [25] that the Ca<sup>2+</sup> increases stimulated by nanosecond UV laser, resulted in the mobilisation of Ca<sup>2+</sup> from the intracellular Ca<sup>2+</sup> stores (ER) causing in a localised increase in Ca<sup>2+</sup> in the cytoplasm.

### Calcium propagation

For many years, the most intensively investigated mechanism for intercellular Ca<sup>2+</sup> wave propagation was based on inositol trisphosphate (IP3) diffusion through gap junction pores, which triggers Ca<sup>2+</sup> release from IP3-sensitive Ca<sup>2+</sup> stores in neighbouring cells. However, recent studies have demonstrated that ATP was an important extracellular messenger in propagating Ca<sup>2+</sup> waves in many cell types. Previous researchers have investigated the role of ATP in astrocyte Ca<sup>2+</sup> signalling. Takano *et al.* and Lee *et al.* [37, 39] observed that mechanically stimulated Ca<sup>2+</sup> waves in purified cortical primary astrocytes from mice could propagate to neighbouring unconnected astrocytes, which suggested that the signalling pathway was extracellular diffusion of the signalling molecule. After adding phosphate-6-azophenyl-2',4'-disulfonate (PPADS), a purinergic receptor antagonist, Takano *et al.* [39] observed that Ca<sup>2+</sup> wave propagation did not propagate to neighbouring non-connected astrocyte areas, which suggested that intercellular Ca<sup>2+</sup> wave propagation was mediated by ATP. Zhao *et al.* [27] have also observed that although IR femtosecond laser-induced Ca<sup>2+</sup> waves of primary rat astrocytes were significantly blocked by ATP receptor antagonists, but were not blocked by gap junction blockers. In

this work, we demonstrated that the propagation of Ca<sup>2+</sup> wave was significantly impeded by the ATP receptor antagonist, suramin. It was found that chemical blocking of gap junctions did not significantly affect the Ca<sup>2+</sup> wave propagations. These results indicated that ATP, rather than gap junction channels, were responsible for mediating the transmission of laser-induced intracellular Ca<sup>2+</sup> signalling in hNT astrocytes which occurred at the neighbours and next nearest neighbour regions in organised networks.

However, various studies have reported the contribution of gap junction to astrocytic Ca<sup>2+</sup> propagation. Hill *et al.* [30] observed that Ca<sup>2+</sup> propagation region of mechanically stimulated NT2 astrocytes in non-patterned well-plates was reduced both by a gap junction blocker, CBX, and a purinergic receptor antagonist, PPADS. Thus, Hill *et al.* [30] demonstrated the Ca<sup>2+</sup> propagation was at least partly dependent on gap junction communication and mediated by the ATP. Fujii *et al.* [31] also demonstrated that Ca<sup>2+</sup> waves of mechanically stimulated rat primary astrocytes on glass coverslips propagated proximally via gap junctions and distally via extracellular diffusion of ATP. Although the Ca<sup>2+</sup> propagation inhibited by gap junction blockers was not measured to be highly significant, several studies have demonstrated that blocking gap junction might slightly inhibit the ATP release. For example, Cotrina *et al.* [46] demonstrated that, in rat primary astrocytes, connexin expression enhanced the release of ATP. Stout *et al.* [47] reported that ATP could also be released through connexin hemichannels in rat primary astrocytes, which subsequently participate in intercellular Ca<sup>2+</sup> communication. Thus, we suggested that in hNT astrocytes, the Ca<sup>2+</sup> wave is mainly mediated by the extracellular ATP and partially collaborated with gap junctions.

We observed that the magnitudes of the Ca<sup>2+</sup> responses of neighbouring cells were significantly lower than that of the stimulated cells. This could be attributed to different mechanisms of Ca<sup>2+</sup> production in the stimulated astrocytes and neighbouring astrocytes. In this work, we demonstrated that Ca<sup>2+</sup> increases in laser-stimulated cells were dependent on intracellular Ca<sup>2+</sup> storage, which can then be subsequently amplified by the CICR. The Ca<sup>2+</sup> responses of neighbouring cells are mainly dependent on ATP binding to the membrane-bound receptors, resulting in the generation of IP<sub>3</sub> which triggers the release of intracellular Ca<sup>2+</sup> from Ca<sup>2+</sup> stores. In addition, there can be ATP drift due to the fluid dynamics of the media, which affected the ATP diffusion and how much ATP is available for uptake.

We suggest that the organised chip model approach is a more representative model of astrocytes in the brain albeit in 2D and regular, over the conventional petri dishes culture models where unpatterned hNT astrocytes are typically observed to be a 'fried egg' shape and touch all of the adjacent astrocytes at their circumference as shown in Fig 2.

## Conclusion

In this article, we carried out an investigation to identify the underlying initiation and propagation mechanisms of intercellular Ca<sup>2+</sup> waves in organised 5×5 hNT astrocyte stellate-like networks under UV nanosecond laser stimulation, at the single-cell level, for the first time. First, we demonstrated that Ca<sup>2+</sup> increases in organised laser stimulated cells were mainly dependent on Ca<sup>2+</sup> released in Ca<sup>2+</sup> stores (ER). Furthermore, we demonstrated that the Ca<sup>2+</sup> propagation from the stimulated cell to neighbouring cells is primarily mediated by extracellular ATP rather than the contributions of gap junctions. This work provides valuable insight, for the first time, on the mechanisms of Ca<sup>2+</sup> wave initiation and propagation in organised adult human stellate-like astrocytic networks following precision activation, using UV nanosecond laser stimulation, demonstrating that extracellular ATP transmission is responsible for Ca<sup>2+</sup> release at the local network scale rather than gap junctions; being observed even down to the nearest neighbour and next nearest neighbouring cells—contrary to the reported gap junction.

This discovery has significant ramifications to many neurological conditions such as epilepsy, stroke and aggressive astrocytomas where gap junctions can be targeted. In cases where such gap junction targeting has failed, this new finding suggests that these conditions should be re-visited and the ATP transmission pathway targeted instead.

## Acknowledgments

This work was performed in part at the NSW node of the Australian National Fabrication Facility, a company established under the National Collaborative Research Infrastructure Strategy to provide nano and micro-fabrication facilities for Australia's researchers.

## Author Contributions

**Conceptualization:** Si Li, E. Scott Graham, Charles P. Unsworth.

**Data curation:** Si Li.

**Formal analysis:** Si Li.

**Funding acquisition:** E. Scott Graham, Charles P. Unsworth.

**Investigation:** Si Li.

**Methodology:** Si Li.

**Project administration:** E. Scott Graham, Charles P. Unsworth.

**Resources:** Si Li, E. Scott Graham, Charles P. Unsworth.

**Software:** Si Li.

**Supervision:** E. Scott Graham, Charles P. Unsworth.

**Validation:** Si Li.

**Visualization:** Si Li.

**Writing – original draft:** Si Li.

**Writing – review & editing:** Si Li, E. Scott Graham, Charles P. Unsworth.

## References

1. Wang D D and Bordey A 2008 The astrocyte odyssey *Prog. Neurobiol.* 86 342–67
2. Kimelberg H K 2007 Supportive or information-processing functions of the mature protoplasmic astrocyte in the mammalian CNS? A critical appraisal *Neuron Glia Biol.* 3 181–9
3. Allen N J and Barres B A 2009 Neuroscience: Glia—more than just brain glue *Nature* 457 675–7
4. Kimelberg H K 2004 The problem of astrocyte identity *Neurochem. Int.* 45 191–202 <https://doi.org/10.1016/j.neuint.2003.08.015> PMID: 15145537
5. Zhao L and Brinton R D 2004 Suppression of Proinflammatory Cytokines Interleukin-1 $\beta$  and Tumor Necrosis Factor- $\alpha$  in Astrocytes by a V1 Vasopressin Receptor Agonist: A cAMP Response Element-Binding Protein-Dependent Mechanism *J. Neurosci.* 24 2226–35
6. Chakraborty S, Kaushik D K, Gupta M and Basu A 2010 Inflammasome signaling at the heart of central nervous system pathology *J. Neurosci. Res.* 88 1615–31
7. Becher B, Prat A and Antel J P 2000 Brain-Immune Connection: Immuno-Regulatory Properties of CNS-Resident Cells 304 293–304
8. Dong Y and Benveniste E N 2001 Immune function of astrocytes *Glia* 36 180–90
9. Lu W, Maheshwari A, Misiuta I, Fox S E, Chen N, Zigova T, Christensen R D and Calhoun D A 2005 Neutrophil-specific chemokines are produced by astrocytic cells but not by neuronal cells *Dev. Brain Res.* 155 127–34



10. De Pittà M, Brunel N and Volterra A 2016 Astrocytes: Orchestrating synaptic plasticity? *Neuroscience* 323 43–61 <https://doi.org/10.1016/j.neuroscience.2015.04.001> PMID: 25862587
11. Furshpan B Y E J and Potter D D 1958 Transmission at the giant motor synapses of the crayfish *Heal. (San Fr.* 289–325
12. Orkand R K 2020 PHYSIOLOGICAL PROPERTIES OF GLIAL CELLS IN THE CENTRAL NERVOUS SYSTEM OF AMPHIBIAL LITTLE IS KNOWN of the physiological proper ties of glial cells in the vertebrate central nervous system. For example, to what extent do glial cell of ions an. d small *Methods*
13. Giaume C, Koulakoff A, Roux L, Holcman D and Rouach N 2010 Astroglial networks: A step further in neuroglial and gliovascular interactions *Nat. Rev. Neurosci.* 11 87–99 <https://doi.org/10.1038/nrn2757> PMID: 20087359
14. Rogawski M A 2005 Astrocytes get in the act in epilepsy *Nat. Med.* 11 919–20 <https://doi.org/10.1038/nm0905-919> PMID: 16145568
15. Halassa M M, Fellin T and Haydon P G 2007 The tripartite synapse: roles for gliotransmission in health and disease *Trends Mol. Med.* 13 54–63 <https://doi.org/10.1016/j.molmed.2006.12.005> PMID: 17207662
16. Seifert G, Schilling K and Steinhäuser C 2006 Astrocyte dysfunction in neurological disorders: a molecular perspective *Nat. Rev. Neurosci.* 7 194–206 <https://doi.org/10.1038/nrn1870> PMID: 16495941
17. Louis D N, Perry A, Reifenberger G, Deimling A Von, Figarella D, Webster B, et al. 2016 The 2016 World Health Organization Classification of Tumors of the Central Nervous System: a summary *Acta Neuropathol.* 131 803–20 <https://doi.org/10.1007/s00401-016-1545-1> PMID: 27157931
18. Hargrave D, Bartels U and Bouffet E 2006 Diffuse brainstem glioma in children: Critical review of clinical trials *Lancet Oncol.* 7 241–8 [https://doi.org/10.1016/S1470-2045\(06\)70615-5](https://doi.org/10.1016/S1470-2045(06)70615-5) PMID: 16510333
19. Pleasure S J, Page C and Lee V M 1992 Pure, postmitotic, polarized human neurons derived from NTera 2 cells provide a system for expressing exogenous proteins in terminally differentiated neurons. *J. Neurosci.* 12 1802–15 <https://doi.org/10.1523/JNEUROSCI.12-05-01802.1992> PMID: 1578271
20. Hara K, Yasuhara T, Maki M, Matsukawa N, Masuda T, Yu S J, et al. 2008 Neural progenitor NT2N cell lines from teratocarcinoma for transplantation therapy in stroke *Prog. Neurobiol.* 85 318–34 <https://doi.org/10.1016/j.pneurobio.2008.04.005> PMID: 18514379
21. Haile Y, Fu W, Shi B, Westaway D, Baker G, Jhamandas J et al. 2014 Characterization of the NT2-derived neuronal and astrocytic cell lines as alternative in vitro models for primary human neurons and astrocytes *J. Neurosci. Res.* 92 1187–98 <https://doi.org/10.1002/jnr.23399> PMID: 24801011
22. Andrews P W 1984 Retinoic acid induces neuronal differentiation of a cloned human embryonal carcinoma cell line in vitro *Dev. Biol.* 103 285–93 [https://doi.org/10.1016/0012-1606\(84\)90316-6](https://doi.org/10.1016/0012-1606(84)90316-6) PMID: 6144603
23. Wang Y, Graham E S and Unsworth C P 2021 Superior galvanostatic electrochemical deposition of platinum nanograss provides high performance planar microelectrodes for in vitro neural recording *J. Neural Eng.* 18
24. Li S, Simpson C M, Graham S and Unsworth C P 2019 Large 10x10 single cell grid networks of human hNT astrocytes on raised parylene-C/SiO<sub>2</sub> substrates *J. Neural Eng.*
25. Raos B J, Graham E S and Unsworth C P 2017 Nanosecond UV lasers stimulate transient Ca<sup>2+</sup> elevations in human hNT astrocytes *J. Neural Eng.* 14 <https://doi.org/10.1088/1741-2552/aa5f27> PMID: 28291741
26. Wheeler B C 2010 Fellow IEEE and Gregory J. Brewer. Designing Neural Networks in Culture. Experiments are described for controlled growth, of nerve cells taken from rats, in predesigned geometrical patterns on laboratory culture dishes *Proc. IEEE Inst. electr Electron Eng* 98 398–406
27. Zhao Y, Zhang Y, Zhou W, Liu X, Zeng S and Luo Q 2010 Characteristics of calcium signaling in astrocytes induced by photostimulation with femtosecond laser *J. Biomed. Opt.* 15 035001
28. Iwanaga S, Kaneko T, Fujita K, Smith N, Nakamura O, Takamatsu T et al. 2006 Location-Dependent Photogeneration of Calcium Waves in HeLa Cells *Cell Biochem. Biophys.* 45 167–76 <https://doi.org/10.1385/CBB:45:2:167> PMID: 16757817
29. Venance L, Stella N, Glowinski J and Giaume C 1997 *Mechanism Involved in Initiation and Propagation of Receptor-Induced Intercellular Calcium Signaling in Cultured Rat Astrocytes*
30. Hill E J, Jiménez-González C, Tarczyłuk M, Nagel D A, Coleman M D and Parri H R 2012 NT2 Derived Neuronal and Astrocytic Network Signalling ed H Okazawa *PLoS One* 7 e36098
31. Fujii Y, Maekawa S and Morita M 2017 Astrocyte calcium waves propagate proximally by gap junction and distally by extracellular diffusion of ATP released from volume-regulated anion channels *Sci. Rep.* 7 13115 <https://doi.org/10.1038/s41598-017-13243-0> PMID: 29030562

32. Bennett M V L, Barrio L C, Bargiello T A, Spray D C, Hertzberg E and Sáez J C 1991 Gap junctions: New tools, new answers, new questions *Neuron* 6 305–20 [https://doi.org/10.1016/0896-6273\(91\)90241-q](https://doi.org/10.1016/0896-6273(91)90241-q) PMID: 1848077
33. Theis M and Giaume C 2012 Connexin-based intercellular communication and astrocyte heterogeneity *Brain Res.* 1487 88–98 <https://doi.org/10.1016/j.brainres.2012.06.045> PMID: 22789907
34. Enkvist M O K and McCarthy K D 1992 Activation of Protein Kinase C Blocks Astroglial Gap Junction Communication and Inhibits the Spread of Calcium Waves *J. Neurochem.* 59 519–26 <https://doi.org/10.1111/j.1471-4159.1992.tb09401.x> PMID: 1629725
35. Höfer T, Venance L and Giaume C 2002 Control and plasticity of intercellular calcium waves in astrocytes: a modeling approach. *J. Neurosci.* 22 4850–9 <https://doi.org/10.1523/JNEUROSCI.22-12-04850.2002> PMID: 12077182
36. Saez J C, Connor J A, Spray D C and Bennett M V L 1989 Hepatocyte gap junctions are permeable to the second messenger, inositol 1,4,5-trisphosphate, and to calcium ions *Proc. Natl. Acad. Sci. U. S. A.* 86 2708–12 <https://doi.org/10.1073/pnas.86.8.2708> PMID: 2784857
37. Lee W, Malarkey E B, Reyes R C and Parpura V 2008 Micropit: A new cell culturing approach for characterization of solitary astrocytes and small networks of these glial cells *Front. Neuroeng.* 1 <https://doi.org/10.3389/neuro.16.002.2008> PMID: 19129909
38. Guthrie P B, Knappenberger J, Segal M, Bennett M V, Charles A C and Kater S B 1999 ATP released from astrocytes mediates glial calcium waves. *J. Neurosci.* 19 520–8 <https://doi.org/10.1523/JNEUROSCI.19-02-00520.1999> PMID: 9880572
39. Takano H, Sul J Y, Mazzanti M L, Doyle R T, Haydon P G and Porter M D 2002 Micropatterned substrates: Approach to probing intercellular communication pathways *Anal. Chem.* 74 4640–6 <https://doi.org/10.1021/ac0257400> PMID: 12349965
40. Raos B J, Simpson M C, Doyle C S, Murray A F, Graham E S and Unsworth C P 2018 Patterning of functional human astrocytes onto parylene-C/SiO<sub>2</sub> substrates for the study of Ca<sup>2+</sup> dynamics in astrocytic networks *J. Neural Eng.* 15 036015
41. Jordan M D, Raos B J, Bunting A S, Murray A F, Graham E S and Unsworth C P 2016 Human astrocytic grid networks patterned in parylene-C inlaid SiO<sub>2</sub> trenches *Biomaterials* 105 117–26 <https://doi.org/10.1016/j.biomaterials.2016.08.006> PMID: 27521614
42. Li S, Simpson M C, Scott Graham E and Unsworth C P 2019 Single Cell Grid Networks of Human Astrocytes on Chip *International IEEE/EMBS Conference on Neural Engineering, NER* vol. 2019-March (IEEE Computer Society) pp 502–5
43. Li S, Graham E S and Unsworth C P 2020 Nanosecond Laser Stimulation in an Organized Grid Network of Human Astrocytes *Proc. Annu. Int. Conf. IEEE Eng. Med. Biol. Soc. EMBS 2020-July* 2245–8
44. Lallouette J, De Pittà M, Berry H 2019 Astrocyte networks and intercellular calcium propagation. *Computational Glioscience.* pp 177–210.
45. Zhao Y, Zhang Y, Liu X, Lv X, Zhou W, Luo Q et al. 2009 Photostimulation of astrocytes with femtosecond laser pulses *Opt. Express* 17 1291 <https://doi.org/10.1364/oe.17.001291> PMID: 19188957
46. Cotrina M L, Lin J H, Alves-Rodrigues A, Liu S, Li J, Azmi-Ghadimi H, et al. 1998 Connexins regulate calcium signaling by controlling ATP release. *Proc. Natl. Acad. Sci. U. S. A.* 95 15735–40 <https://doi.org/10.1073/pnas.95.26.15735> PMID: 9861039
47. Stout C E, Costantin J L, Naus C C G and Charles A C 2002 Intercellular calcium signaling in astrocytes via ATP release through connexin hemichannels *J. Biol. Chem.* 277 10482–8
